# Supplementary material for: Cannabis Use Frequency and Cannabis-Related Consequences in High-Risk Young Adults Across Cannabis Legalization
Source: PubMed Central journal article supplement (PMC10534274; doi:10.1001/jamanetworkopen.2023.36035), 2023-09-27
Supplement: jamanetwopen-e2336035-s001.pdf [file jamanetwopen-e2336035-s001.pdf]

## Supplemental Online Content

Doggett A, Belisario K, McDonald AJ, Ferro MA, Murphy JG, MacKillop J. Cannabis use frequency and cannabis-related consequences in high-risk young adults across cannabis legalization. *JAMA Netw Open*. 2023;6(9):e2336035. doi:10.1001/jamanetworkopen.2023.36035

**eFigure 1.** Distribution of Participation Across 7 Study Waves

**eTable.** Attrition Analysis

**eFigure 2.** Prelegalization B-MACQ and CUDIT Summaries by Cannabis Use Category

This supplemental material has been provided by the authors to give readers additional information about their work.

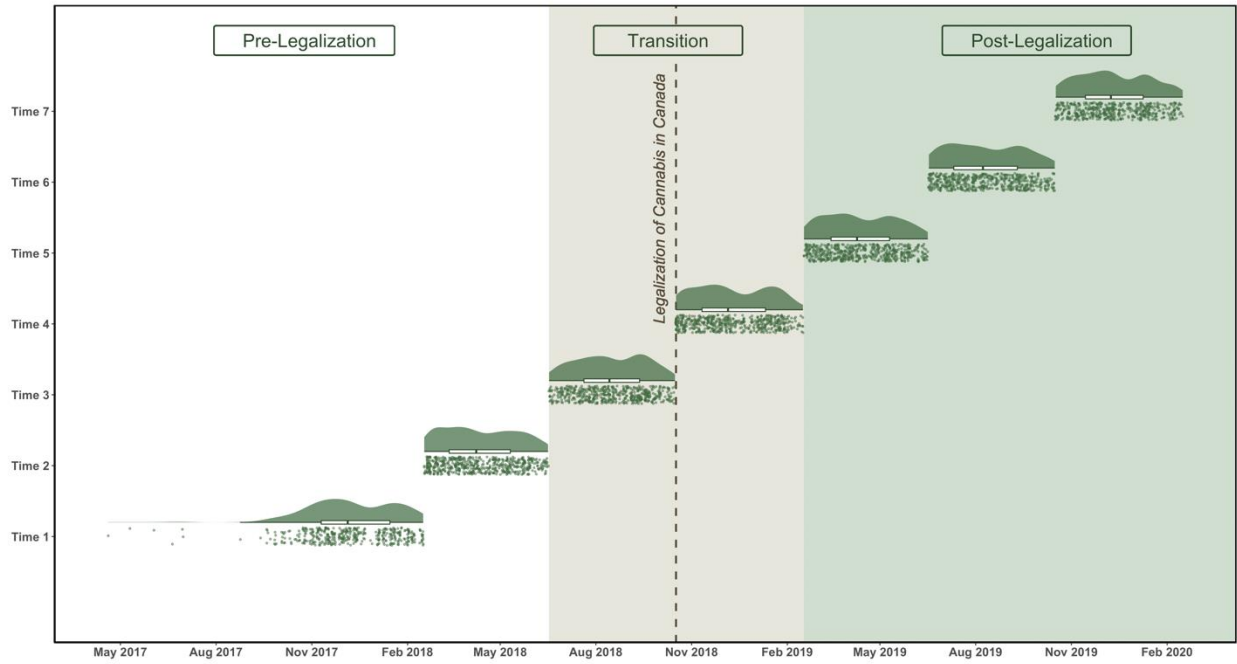

eFigure 1. Distribution of Participation Across 7 Study Waves

eTable. Attrition Analysis

| Baseline Characteristics     | Mean (SD)          |                    | p-value <sup>1</sup> |
|------------------------------|--------------------|--------------------|----------------------|
|                              | Included (N = 619) | Excluded (N = 107) |                      |
| Female Sex, N (%)            | 345 (55.7%)        | 37 (34.6%)         | <0.001               |
| Non-White Ethnicity, N (%)   | 191 (30.9%)        | 26 (24.3%)         | 0.21                 |
| Age                          | 21.43 (1.19)       | 21.41 (1.16)       | 0.86                 |
| Cannabis ASSIST <sup>2</sup> | 1.08 (0.05)        | 1.49 (0.14)        | 0.006                |
| B-MACQ <sup>3</sup> Score    | 3.76 (0.22)        | 5.56 (0.64)        | 0.009                |

<sup>1</sup>Chi-square test of independence

<sup>2</sup>ASSIST: Alcohol, Smoking, Substance Involvement Screening Test (ASSIST). Response options are “none,” “monthly,” “weekly,” “daily,” or “multiple times daily.”

<sup>3</sup>B-MACQ: Brief Marijuana Consequences Questionnaire.

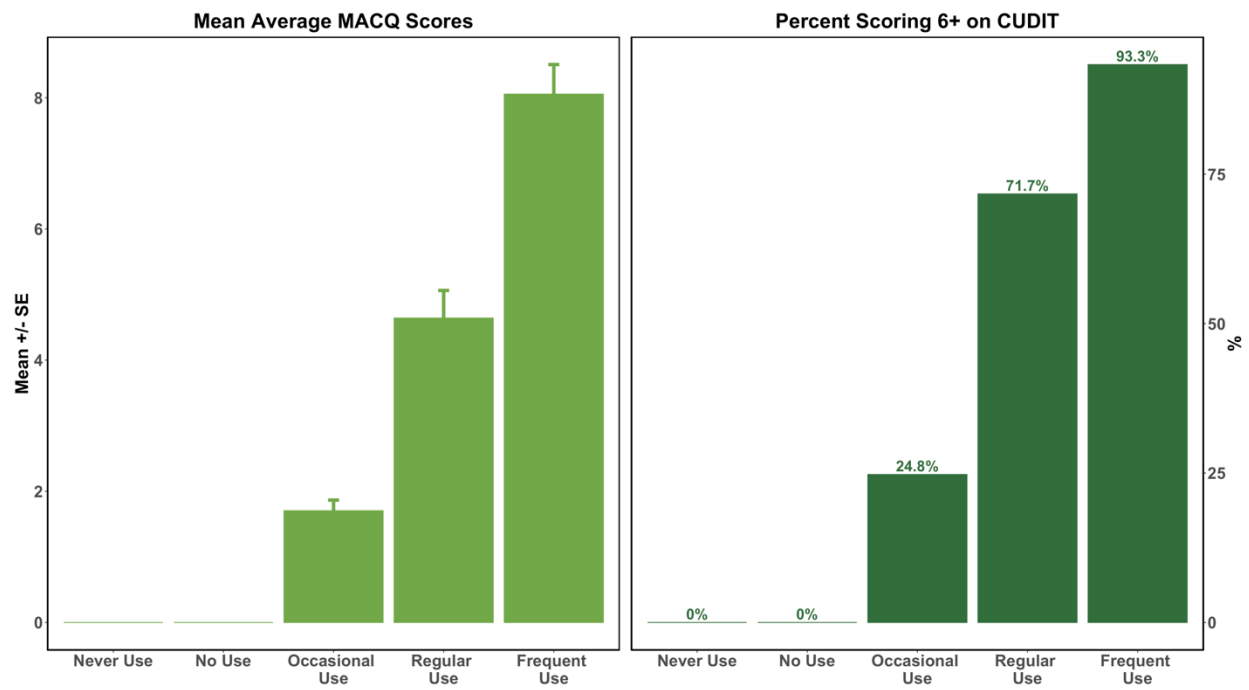

Figure 2. Prelegalization B-MACQ and CUDIT Summaries by Cannabis Use Category  
 CUDIT: Cannabis Use Disorders Identification Test  
 B-MACQ: Brief Marijuana Consequences Questionnaire
