# Supplementary material for: Cannabis Use Frequency and Cannabis-Related Consequences in High-Risk Young Adults Across Cannabis Legalization
Source: PubMed Central journal article supplement (PMC10534274; doi:10.1001/jamanetworkopen.2023.36035), 2023-09-27
Supplement: jamanetwopen-e2336035-s002.pdf [file jamanetwopen-e2336035-s002.pdf]

## Data Sharing Statement

Doggett. Cannabis Use Frequency and Cannabis-Related Consequences in High-Risk Young Adults Across Cannabis Legalization. *JAMA Netw Open*. Published September 27, 2023.  
doi:10.1001/jamanetworkopen.2023.36035

### Data

**Data available:** No
